# Sex-specific expression and DNA methylation in a species with extreme sexual dimorphism and paternal genome elimination.

Stevie A. Bain<sup>1†</sup>, Hollie Marshall<sup>1†\*</sup> and Laura Ross<sup>1</sup>

<sup>1</sup>Institute of Evolutionary Biology, University of Edinburgh, UK.

<sup>†</sup>These authors contributed equally.

\*Corresponding author.

Thursday 25<sup>th</sup> June, 2020

1 **Contact:** [stevie.bain@ed.ac.uk](mailto:stevie.bain@ed.ac.uk), [hollie\\_marshall@hotmail.co.uk](mailto:hollie_marshall@hotmail.co.uk), [laura.ross@ed.ac.uk](mailto:laura.ross@ed.ac.uk).

2 **Abstract word count:** 256.

3 **Document work count:** 7610.

4 **Running title (45 characters):** Sex-specific DNA methylation in a mealybug.

5 **Keywords**— *Planococcus citri*, mealybug, doublesex, genomic imprinting.

## 6 **Abstract**

7 *Sexual dimorphism is exhibited in many species across the tree of life with many phenotypic*  
8 *differences mediated by differential expression and alternative splicing of genes present in*  
9 *both sexes. However, the mechanisms that regulate these sex-specific expression and splicing*  
10 *patterns remain poorly understood. The mealybug, *Planococcus citri*, displays extreme sexual*  
11 *dimorphism and exhibits an unusual instance of sex-specific genomic imprinting, Paternal*  
12 *Genome Elimination (PGE), in which the paternal chromosomes in males are highly condensed*  
13 *and eliminated from the sperm. *P. citri* also has no sex chromosomes and as such both sexual*  
14 *dimorphism and PGE are predicted to be under epigenetic control. We recently showed that*  
15 **P. citri* females display a highly unusual DNA methylation profile for an insect species, with*  
16 *the presence of promoter methylation associated with lower levels of gene expression. In this*  
17 *study we therefore decided to explore genome-wide differences in DNA methylation between*  
18 *male and female *P. citri* using whole genome bisulfite sequencing. We have identified extreme*  
19 *differences in genome-wide levels and patterns between the sexes. Males display overall higher*  
20 *levels of DNA methylation which manifests as more uniform low-levels across the genome.*  
21 *Whereas females display more targeted high levels of methylation. We suggest these unique*  
22 *sex-specific differences are due to chromosomal differences caused by PGE and may be linked*  
23 *to possible ploidy compensation. Using RNA-Seq we identified extensive sex-specific gene*  
24 *expression and alternative splicing. We found cis-acting DNA methylation is not directly*  
25 *associated with differentially expressed or differentially spliced genes, indicating a broader role*  
26 *for chromosome-wide trans-acting DNA methylation in this species.*

## 27 **Introduction**

28 Sexual dimorphism is widespread across sexually-reproducing organisms. Males and females can  
29 differ dramatically in morphology, behaviour and physiology. Some of this dimorphism results  
30 from genetic adaptations that reside on sex chromosomes (Mank, 2009). However, many of these  
31 phenotypic differences are instead mediated by the differential expression of genes present in  
32 both sexes (Ellegren and Parsch, 2007). Sex-biased gene expression has been widely studied and  
33 varies amongst species, tissues and developmental stages (Grath and Parsch, 2016). However, the  
34 mechanisms that regulate these sex-specific expression patterns are often poorly understood.

35 DNA methylation is a well-characterised epigenetic modification that could facilitate such  
36 variation in expression (Grath and Parsch, 2016). DNA methylation is found throughout the genome  
37 of many organisms (Suzuki and Bird, 2008) and occurs most frequently at 5'-CG-3' dinucleotides,  
38 known as CpG dinucleotides (Bird, 1986). In mammalian somatic tissue, 70-80% of all CpG  
39 sites are methylated (Feng *et al.*, 2010) and methylation at promoter regions can suppress gene  
40 transcription, leading to stable gene silencing (Bird, 2002). This is implicated in the regulation of  
41 sex-specific and sex-biased gene expression (examples include: Hall *et al.*, 2014; Maschietto *et al.*,  
42 2017). In contrast, DNA methylation levels in arthropods are generally much sparser and vary across  
43 taxa (Thomas *et al.*, 2020). In most insects, DNA methylation is almost exclusively restricted to  
44 exons in a small subset of transcribed genes (Zemach *et al.*, 2010). The highest levels of global  
45 DNA methylation are found in hemimetabolous insects (e.g. 14% in Blattodea, Bewick *et al.*, 2017),  
46 while methylation is largely absent from holometabolous species (Provataris *et al.*, 2018; Lewis  
47 *et al.*, 2020). In insects, the role of DNA methylation in the regulation of gene expression remains  
48 inconclusive. However, studies show that DNA methylation is generally associated with elevated,  
49 stable gene expression (Foret *et al.*, 2009; Bonasio *et al.*, 2012; Wang *et al.*, 2013; Glastad *et al.*,  
50 2016).

51 Despite evidence suggesting a relationship between DNA methylation and gene expression,

52 few insect studies have directly explored sex-specific DNA methylation patterns and their association  
53 with sex-specific gene expression. In the jewel wasp, *Nasonia vitripennis*, 75% of expressed genes  
54 show sex-biased expression, however, DNA methylation patterns between the sexes are similar and  
55 do not explain gene expression patterns (Wang *et al.*, 2015). In contrast, a study in the peach aphid,  
56 *Myzus persicae*, in which 19% of genes exhibit sex-specific expression biases, reveals a correlation  
57 between sex-specific gene expression and sex-specific methylation, particularly for genes located on  
58 the sex chromosomes (Mathers *et al.*, 2019). Thus, the role of sex-specific patterns of methylation in  
59 regulating sex-biased gene expression in insects remains unclear.

60 The citrus mealybug, *Planococcus citri* (Hemiptera: Pseudococcidae), is uniquely suited  
61 for studying the functional role of DNA methylation in sex-specific gene expression. *P. citri* is a  
62 sexually reproducing species in which sexual dimorphism is extreme in morphology, life history and  
63 chromosome behaviour. Whilst the sexes are indistinguishable as nymphs, adult males and females  
64 are so morphologically distinct they could be mistaken as members of different species (Figure 1).  
65 Males undergo metamorphosis after the second instar and develop into winged adults (Sutherland,  
66 1932). Females do not metamorphose, retain their larval appearance (neoteny), so remain wingless,  
67 and grow much larger than the males (Sutherland, 1932). In contrast to females, males do not feed  
68 after their second instar. Consequently, there is a large difference in lifespan between the sexes; with  
69 males only living up to 3 days after eclosion, while females can live several weeks after reaching  
70 sexual maturity (Nelson-Rees, 1960). Crucially, *P. citri* have no sex chromosomes meaning that  
71 males and females share the same genetic complement (Hughes-Schrader, 1948); therefore, the  
72 observed sexual dimorphism is solely a consequence of gene expression differences between the  
73 sexes.

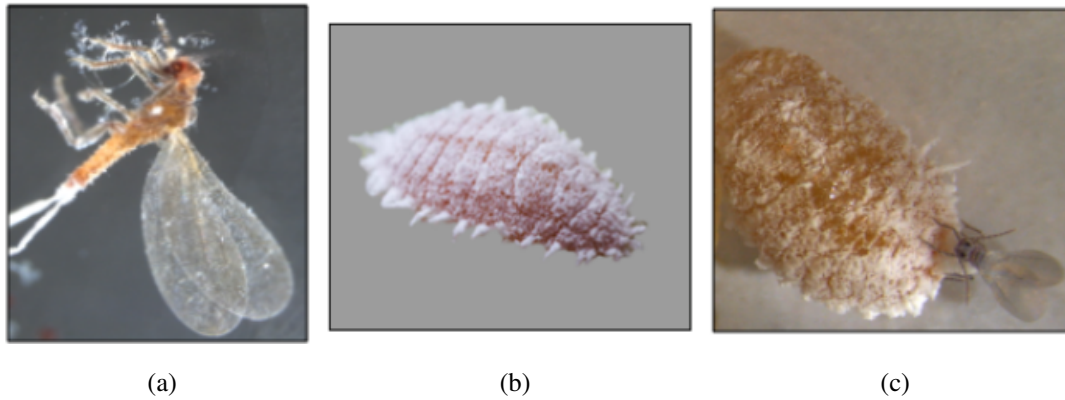

Figure 1: Extreme sexual dimorphism present in *Planococcus citri*. (a) Winged adult male, (b) neotenous adult female, (c) shows a male and female mating, where size difference between the sexes is apparent.

74 In addition to extreme sexual dimorphism, *P. citri* also has an unusual reproductive strategy,  
75 known as Paternal Genome Elimination (PGE). PGE is a genomic imprinting phenomenon found in  
76 thousands of insect species that involves the silencing and elimination of an entire haploid genome in  
77 a parent-of-origin specific manner. Under PGE, both sexes develop from fertilized eggs and initially  
78 possess a diploid euchromatic chromosome complement. However, males subsequently eliminate  
79 paternally-inherited chromosomes during spermatogenesis and only transmit maternally-inherited  
80 chromosomes to their offspring (Brown and Nelson-Rees, 1961). Furthermore, in *P. citri* males,  
81 paternally-inherited chromosomes are heterochromatinised in early development (Brown and Nur,  
82 1964; Bongiorno *et al.*, 2001) and thus gene expression shows a maternal bias (de la Filia *et al.*,  
83 2020). Females, on the other hand, do not undergo the process of PGE and both maternally and  
84 paternally-derived chromosomes remain euchromatic throughout development (Brown and Nur,  
85 1964). Due to the haploidization of males, PGE is often referred to as a ‘pseudohaplodiploid’ system.

86 Furthermore, we have previously shown *P. citri* females have a unique pattern of whole  
87 genome DNA methylation that differs from that found in other arthropods (Lewis *et al.*, 2020).  
88 Whilst most arthropods have depleted levels of transposable element and promoter methylation, *P.*  
89 *citri* has independently evolved both (Lewis *et al.*, 2020). Interestingly, and similar to patterns shown



90 in mammals, genes with low expression in *P. citri* have significantly higher promoter methylation  
91 than highly expressed genes (Lewis *et al.*, 2020). It is also suggested that DNA methylation may  
92 have a role in the recognition and silencing of paternally-derived chromosomes in males in the  
93 process of PGE (Bongiorni *et al.*, 1999; Buglia *et al.*, 1999). Supporting the idea that DNA  
94 methylation may be involved in sexual dimorphism and PGE in mealybugs and other scale insects,  
95 two recent studies have identified sex-biased expression of the DNA methyltransferase DNMT1  
96 in adult *Phenacoccus solenopsis* (Omar *et al.*, 2020) and *Ericerus pela* (Yang *et al.*, 2015), with  
97 females showing considerably higher expression compared to males in both species.

98 In order to identify sex-specific patterns of gene expression and clarify the role of DNA  
99 methylation in this process, we analyse both male and female *P. citri* methylomes and transcriptomes.  
100 This is the first genome-wide analysis of sex-specific gene expression and DNA methylation in scale  
101 insects. Using RNA-seq and whole genome bisulfite sequencing (WGBS) we find clear differences  
102 in gene expression and methylation profiles between the sexes. However, we find no relationship  
103 between differentially expressed genes and differentially methylated genes, indicating that *cis*-acting  
104 DNA methylation is not the sole driver of sex-specific gene expression in adult *P. citri*.

## 105 **Materials and Methods**

### 106 **Insect husbandry**

107 Mealybug cultures used for this study were kept on sprouting potatoes in sealed plastic bottles at  
108 25°C and 70% relative humidity. Under these conditions, *P. citri* has a generation time (time from  
109 oviposition until sexual maturity) of approximately 30 days. Experimental isofemale lines were  
110 reared in the laboratory under a sib-mating regime: in each generation, one mated female is taken  
111 per culture and transferred to a new container to give rise to the next generation. The *P. citri* line  
112 used (WYE 3-2) was obtained from the pest control company, WyeBugs in 2011, and had undergone  
113 32 generations of sib-mating prior to this experiment. This high degree of inbreeding allows for  
114 precise mapping of Whole Genome Bisulfite-seq (WGBS) reads reducing mis-mapping caused by  
115 SNP variation. It also means we avoid contrasting methylation profiles caused by differences in the  
116 underlying genotype of individuals (epialleles).

117 We isolated virgin females after they became distinguishable from males (3rd-4th instar) and  
118 kept them in separate containers until sexual maturity (>35-days old). Males were isolated at the  
119 pupal stage and kept in separate containers until eclosion (~27 days). Insects were stored at -80°C  
120 until DNA and RNA extraction.

### 121 **RNA extraction and sequencing**

122 We extracted RNA (3 biological replicates per sex, 60 males and 15 females per replicate) using  
123 TRIzol® reagent (Thermo Fisher Scientific, USA) according to the manufacturer's instructions and  
124 PureLink RNA purification kit (including DNase I digestion). Individual adult males are smaller  
125 than females; therefore, a higher number of males was required for each pooled sample. Samples  
126 were further purified with RNA Clean and Concentrator™-5. Quantity and quality of extracted  
127 genetic material was assessed using NanoDrop ND-1000 Spectrophotometer (Thermo Scientific,

128 USA) and Qubit (Thermo Fisher Scientific, USA) assays. A260/A280 and A260/A230 ratios were  
129 calculated for all samples and only samples with A260/A280 of 1.7 - 2.0 and A260/A230 of >1.0  
130 were processed. All RNA samples were sequenced by Edinburgh Genomics. Two of the samples (one  
131 male and one female) were sequenced on the Illumina HiSeq 4000 platform (75b paired-end reads).  
132 The remaining samples were sequenced on the Illumina NovaSeq S2 platform (50b paired-end reads).

### 133 **DNA extraction and bisulfite sequencing**

134 We extracted genomic DNA from pools of 60 whole adult males and 15 whole virgin adult females  
135 using DNeasy Blood and Tissue kit (Qiagen, CA) and Promega DNA Clean and Prep Kit (Promega)  
136 in a custom DNA extraction protocol. Individual adult males are smaller than females; therefore,  
137 a higher number of males was required for each pooled sample. Five independent biological  
138 replicates were set up for each sex. DNA samples were cleaned and concentrated using Zymo DNA  
139 Clean and Concentrator Kit according to manufacturer's instructions. DNA A260/A280 absorption  
140 ratios were measured with a NanoDrop ND-1000 Spectrophotometer (Thermo Scientific, USA) and  
141 concentrations were measured with a Qubit Fluorometer (Life Technologies, CA). Although five  
142 samples for each sex were prepared, two male samples had to be pooled in order to collect adequate  
143 DNA (500ng) for bisulfite conversion and library preparation. Therefore, there are only four male  
144 replicates.

145 Bisulfite conversion and library preparation was carried out by Beijing Genomics Institute  
146 (BGI). The bisulfite conversion rate is estimated based on non-methylated *Escherichia coli* lambda  
147 DNA (provided by BGI; isolated from a heat-inducible lysogenic *E. coli* W3110 strain. Gen-  
148 Bank/EMBL accession numbers J02459, M17233, M24325, V00636, X00906), which was added  
149 at 1% to *P. citri* DNA samples. Sequencing of bisulfite libraries was carried out on an Illumina  
150 HiSeq4000 instrument to generate 150b paired-end reads.

## 151 **Differential expression and alternative splicing**

152 Raw RNA-seq reads for each sample were trimmed for low quality bases and adapters using Fastp  
153 for paired-end reads (Chen et al., 2018). Fastp was used as it allows removal of poly-G tails from  
154 NovaSeq reads. We quantified gene-level expression for each sample using RSEM v1.2.31 (Li  
155 and Dewey, 2011) with STAR v2.5.2a (Dobin *et al.*, 2016) based on the *P. citri* reference genome  
156 and annotation (mealybug.org, version v0). Average expression and coefficient of variation was  
157 calculated per gene for individual male and female samples using FPKM (fragments per kilobase of  
158 transcript per million) values estimated by RSEM. Differentially expressed genes between the sexes  
159 were identified using EbSeq (Leng et al., 2013) based on gene-level expected counts produced by  
160 RSEM. A gene was considered differentially expressed if it had a fold-change >1.5 and a p-value <  
161 0.05 after adjusting for multiple testing using the Benjamini-Hochberg procedure (Benjamini and  
162 Hochberg, 1995).

163       Alternatively spliced genes between sexes were identified using DEXSeq (Anders *et al.*, 2012)  
164 implemented by IsoformSwitchAnalyzeR (Vitting-Seerup and Sandelin, 2019). Briefly, this package  
165 implements a general linear model per gene which tests the relative proportion of expression of each  
166 exon per sex. This method accounts for within-sex gene expression differences and sex-specific  
167 gene expression differences. A gene was considered alternatively spliced if it had an absolute  
168 isoform usage difference of 10% and a p-value < 0.05 after adjusting for multiple testing using the  
169 Benjamini-Hochberg procedure (Benjamini and Hochberg, 1995).

## 170 **Genome-wide methylation patterns and differential methylation**

171 Initial QC of Illumina reads was carried out using FastQC v.0.11.7 (Andrews, 2010). Quality and  
172 adapter trimming were carried out by BGI. *E. coli* and *P. citri* reference genomes (*P. citri* version  
173 v0, publicly available on mealybug.org) were converted to bisulfite format using Bismark Genome  
174 Preparation v0.19.0 (Krueger and Andrews, 2011). Illumina reads were first aligned to the converted

175 unmethylated lambda *E. coli* control DNA sequence using Bismark v0.19.0 (Krueger and Andrews,  
176 2011) to estimate the error rate of the C to T conversion. Bismark v0.19.0 and Bowtie2 were then  
177 used to align reads to the reference genome using standard parameters. The weighted methylation  
178 level of each genomic feature (*P. citri* v0 annotation, mealybug.org) was calculated as in Schultz  
179 *et al.* (2012). Briefly, this method accounts for the CpG density of a region by calculating the sum of  
180 all cytosine calls for every CpG position in a region (promoter/exon/gene etc.) divided by the total  
181 cytosine and thymine calls in the same region.

182 For differential methylation analysis between sexes coverage outliers (above the 99.9%  
183 percentile) and bases covered by < 10 reads were removed. Each CpG per sample was subjected to  
184 a binomial test to determine the methylation state, where the lambda conversion rate was used as  
185 the probability of success. Only CpGs which were determined as methylated in at least one sample  
186 were the tested via a logistic regression model, implemented using methylKit v1.10.0 (Akalin *et al.*,  
187 2012), for differential methylation between the sexes. P-values were corrected for multiple testing  
188 using the Benjamini-Hochberg procedure (Benjamini and Hochberg, 1995). CpGs were considered  
189 differentially methylated if they had a q-value < 0.01 and a minimum methylation difference of 15%.

190 Promoter and exon regions were classed as differentially methylated if they contained at least  
191 three significant differentially methylated CpG sites and had a weighted methylation difference >15%  
192 across the entire region. Significant overlap of genes with promoter and exon differential methylation  
193 was determined using the hypergeometric test and visualised using the UpSetR package v1.4.0 (Lex  
194 *et al.*, 2016).

## 195 **Relationship of gene expression and DNA methylation**

196 The relationship of promoter and exon methylation with gene expression and alternative splicing was  
197 assessed using custom R scripts. The mean FPKM and weighted methylation level was calculated  
198 across biological replicates for each sex. The presence of interaction effects in linear models was  
199 determined throughout using the *anova* function in R. Post-hoc testing of fixed factors was conducted

200 using the *glht* function from the *multcomp* v1.4-12 R package with correction for multiple testing  
201 using the single-step method (Hothorn *et al.*, 2008). Correlations were calculated using Spearman's  
202 rank correlation rho.

### 203 **Additional genome annotation**

204 Promoter regions were defined as 2000bp upstream from each gene. We excluded promoters  
205 which overlap using BEDTools (Quinlan and Hall, 2010). Intergenic regions were determined as  
206 regions between the end of one gene and the beginning of the next gene's promoter, excluding any  
207 annotated TEs. In order to determine possible sex-specific differences in transposable element  
208 (TE) methylation we annotated TEs within the *P. citri* genome. Following Lewis *et al.* (2020) we  
209 implemented RepeatModeller v.2.0 to create a model of TEs and then annotated these TE models  
210 with RepeatMasker v4.1.0 (<http://www.repeatmasker.org>). Differentially methylated CpGs were  
211 determined to originate from TEs if there was no genomic overlap with any other annotation, such as  
212 a gene body.

### 213 **Gene ontology enrichment**

214 Gene ontology (GO) enrichment was carried out using the hypergeometric test with Benjamini-  
215 Hochberg correction for multiple testing (Benjamini and Hochberg, 1995), using the GOSStats R  
216 package (Falcon and Gentleman, 2007). GO biological process terms were classed as over-represented  
217 if they had a q-value <0.05. REVIGO (Supek *et al.*, 2011) was used to visualise GO terms and obtain  
218 GO term descriptions. GO terms for genes with different levels of methylation were tested against a  
219 background of all genes. GO terms for genes which show female/male over expression were tested  
220 against a background of all genes identified in the RNA-Seq data. GO terms for genes which show  
221 extreme female/male over expression were tested against a background of all differentially expressed  
222 genes. GO terms for genes which show hypermethylation in either females/males were tested against  
223 a background of all genes identified in the WGBS data.



## 224 **Results**

### 225 **Sex-biased gene expression and alternative splicing**

226 All RNA-Seq samples generated between 66.9 million and 84.1 million paired-end reads with an  
227 average mapping rate of 87% (Supplementary 1.0.1). Genes showing different levels and patterns  
228 of sex-bias are likely subject to different evolutionary processes modulating their expression and  
229 sex-specificity (Wang, Werren and Clark, 2015). Therefore, in this study we distinguish three general  
230 categories of sex-biased genes. The first category contains sex-biased genes, defined as having  
231 >1.5-fold difference in expression between the sexes ( $q < 0.05$ ). The second contains extremely  
232 sex-biased genes, which are those that show >10-fold difference in expression between the sexes ( $q$   
233  $< 0.05$ ). The third category consists of sex-limited genes, i.e. those with some level of expression in  
234 one sex but no detectable expression in the other sex.

235 *P. citri* shows extreme sex-specific expression with many genes showing complete sex-limited  
236 expression (Fig.2a). We have identified a total of 10,548 significant genes with sex-biased expression  
237 between *P. citri* males and females (Fig.2b, Supplementary 1.0.2). This is 26.5% of the estimated  
238 39,801 genes in the *P. citri* genome and 54.7% of all genes identified as expressed in at least  
239 one sex in the RNA-Seq data ( $n = 19,282$ ). Of these sex-biased genes, 10,026 show moderate  
240 sex-biased expression ( $q < 0.05$  and >1.5 fold change) with significantly more showing female biased  
241 expression (5,270 compared to 4,756, chi-squared goodness of fit:  $X^2 = 26.351$ ,  $df = 1$ ,  $p$   
242  $< 0.001$ ). GO term enrichment analysis of sex-biased genes show that both female and male biased  
243 genes are enriched for core biological processes such as biosynthetic processing and carbohydrate  
244 metabolism (Supplementary 1.0.3). Additionally, female sex-biased genes are enriched for the GO  
245 term "*methylation*" (GO:0032259) and male sex-biased genes are enriched for "*chitin metabolic*  
246 *process*" (GO:0006030).

247 We also identify 168 extremely sex-biased genes ( $q < 0.05$  and >10 fold change, Supplementary

248 1.0.2), with the majority of these showing extreme male-biased expression (140 compared to 28,  
249 chi-squared goodness of fit:  $X\text{-squared} = 74.667$ ,  $df = 1$ ,  $p < 0.001$ , Fig.2c). There were only three  
250 GO terms enriched for extremely biased male genes, these were "*system process*" (GO:0003008),  
251 "*sensory perception*" (GO:0007600) and "*sensory perception of smell*" (GO:0007608). Female *P.*  
252 *citri* are known to produce pheromones to attract males (Bierl-Leonhardt *et al.*, 1981), therefore it  
253 may be that these extremely male-biased genes are involved in pheromone response. There were no  
254 enriched GO terms for genes showing extreme expression bias in females.

255 Finally, we identify 354 sex-limited genes ( $q < 0.05$  and zero expression in one sex, Supple-  
256 mentary 1.0.2) in *P. citri*. Of these, significantly more are sex-limited to males compared to females  
257 (204 compared to 150, chi-squared goodness of fit:  $X\text{-squared} = 8.2373$ ,  $df = 1$ ,  $p = 0.01$ ). GO terms  
258 enriched for female sex-limited genes include: "*growth*" (GO:0040007) and "*anatomical structure*  
259 *development*" (GO:0048856) amongst others (Supplementary 1.0.3). GO terms enriched for male  
260 sex-limited genes include: the same three GO terms mentioned above for extreme sex-biased genes  
261 as well as "*proteolysis*" (GO:0006508) and some other more general terms (Supplementary 1.0.3).

262 Next we searched for alternative splicing differences between the sexes. In the current  
263 genome annotation, (*P.citri* v0 mealybug.org), 93.13% of genes are annotated as single isoforms.  
264 After filtering out genes which also have low expression in both sexes ( $< 10$  FPKM), 1,235 genes  
265 were tested for alternative splicing. 209 genes were found to be significantly alternatively spliced  
266 between the sexes, consisting of 423 isoforms ( $q < 0.05$  and a minimum percentage difference of 25%,  
267 Supplementary 1.0.4). The GO terms enriched for alternatively spliced genes are varied, including  
268 some related to protein modification (Supplementary 1.0.5).

269 We next checked to see if any of the same genes show both sex-biased expression and  
270 sex-biased alternative splicing. We found that there was a significant overlap of alternatively spliced  
271 genes and genes with sex-specific expression bias (112/209), hypergeometric test,  $p < 0.001$ ). The  
272 majority of these genes (104/112) also show higher levels of male expression compared to higher  
273 female expression (chi-squared goodness of fit:  $X\text{-squared} = 82.286$ ,  $df = 1$ ,  $p < 0.001$ , Fig.2d). There

274 were no GO terms enriched for female bias and unbiased alternatively spliced genes compared to all  
275 alternatively spliced genes as a background. However, male biased alternatively spliced genes were  
276 enriched for metabolic processes and "*proteolysis*" (GO:0006508) (Supplementary 1.0.5).

277         The sex-determination system in *P. citri* is unknown and alternative splicing of the *doublesex*  
278 gene has been implicated in sex-determination in the vast majority of insect species (Wexler *et al.*,  
279 2019). We therefore checked to see if any genes orthologous to the *Drosophila melanogaster*  
280 *doublesex* gene (as determined in: de la Filia *et al.*, 2020) were alternatively spliced. There were five  
281 genes in the current annotation (*P.citri* v0 mealybug.org) which are othlogous to *D. melanogaster*  
282 *doublesex* (*g1737*, *g2969*, *g11101*, *g11102* and *g36454*). We checked the list of differentially  
283 alternative spliced genes between sexes and none of these genes were differentially alternatively  
284 spliced, suggesting the method of sex-differentiation in this species is not via alternative splicing of  
285 *doublesex*. We also checked for sex-biased expression of these genes and only two were expressed,  
286 *g2969* and *g36454*, the former shows unbiased expression and the latter shows male-biased expression  
287 although overall expression levels are low. Finally, it is also worth noting *transformer*, a gene  
288 required for *doublesex* splicing (Wexler *et al.*, 2019) is not present in the *P. citri* genome.

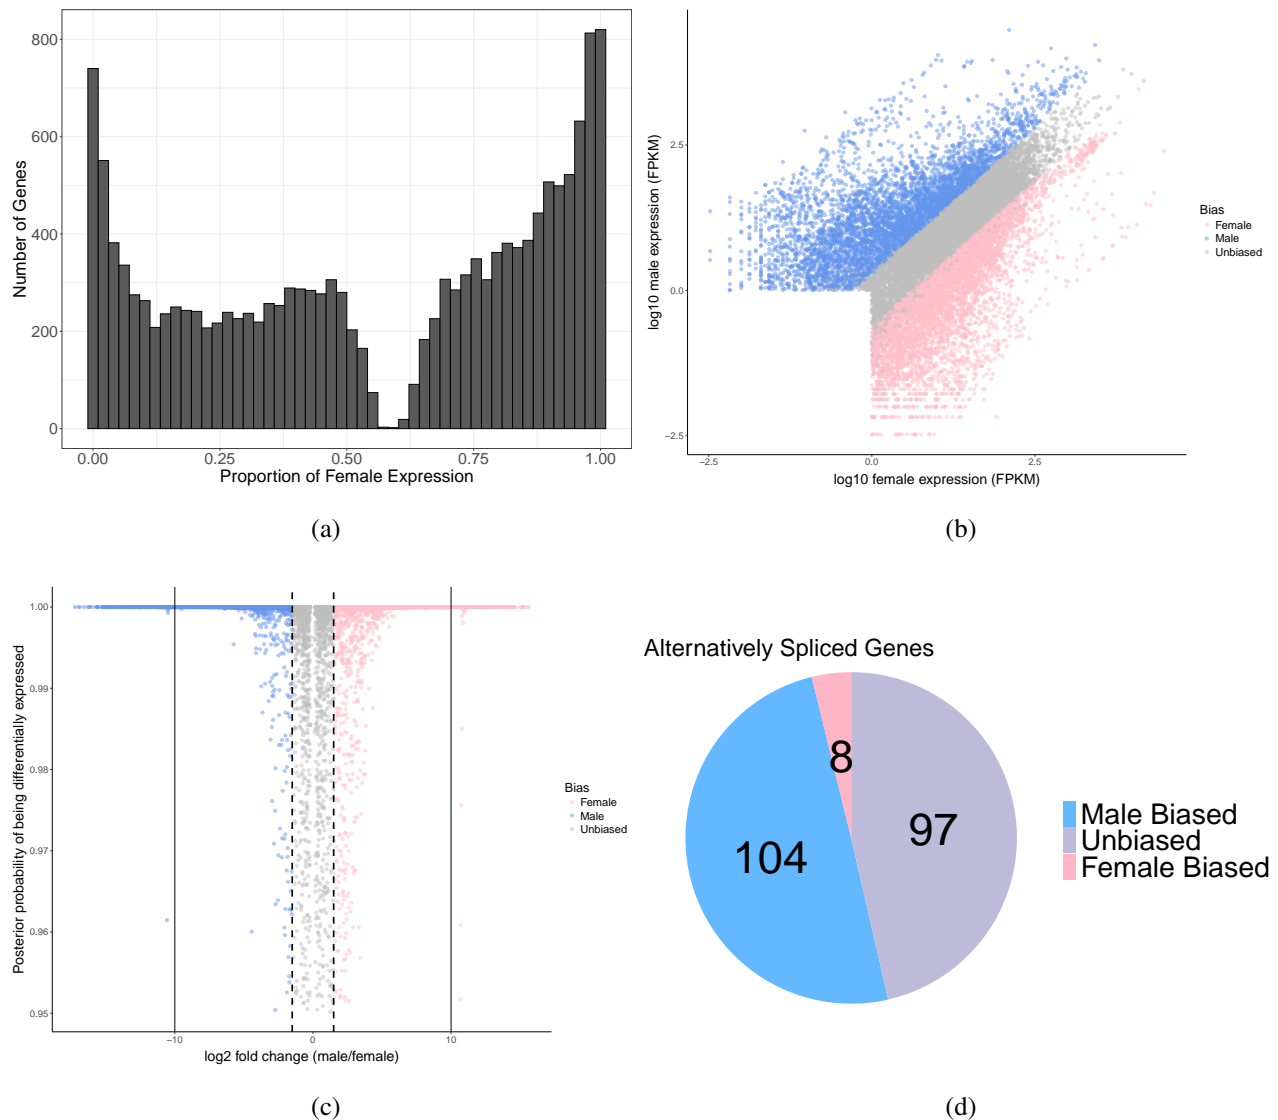

Figure 2: (a) Histogram of the proportion of female expression per gene for all genes present in the RNA-Seq data ( $n = 19,282$ ). (b) Scatter graph of the log<sub>10</sub> fragments per kilobase of transcript per million mapped reads (FPKM) for male and female samples. Each point is a gene. (c) The difference in the fold-change of genes plotted against the probability of being differentially expressed. Each point is a gene. (d) Pie chart showing the number of alternatively spliced genes which are also differentially expressed (male/female bias) or unbiased.

---

## 289 **Sex-specific DNA methylation: genome-wide trends**

290 Mapping rates for samples to the *P. citri* reference genome were  $53.6\% \pm 2.8\%$  (mean  $\pm$  standard  
291 deviation). This equated to  $24,220,848 \pm 1,786,437$  reads, which after deduplication gave an average  
292 coverage of  $14.5X \pm 1.1X$  (Supplementary 1.0.7). The bisulfite conversion efficiency across samples,  
293 calculated from the lambda spike, was  $99.53\% \pm 0.05\%$ . After correcting for this the single-site  
294 methylation level (Schultz *et al.*, 2012) in a non-CpG context was calculated as  $0.05\% \pm 0.05\%$   
295 for females and  $0.13\% \pm 0.05\%$  for males. In a CpG context, females have significantly lower  
296 methylation levels compared to males,  $7.8\% \pm 0.35\%$  and  $9.28\% \pm 0.26\%$  respectively (Fig.3a, t-test:  
297  $t = -7.17$ ,  $df = 6.99$ ,  $p < 0.001$ ). Additionally, using genome-wide CpG methylation levels males and  
298 females cluster separately, with females clustering much more tightly compared to males (Fig.3b).  
299 The diversity within male samples may be explained by a lower input of DNA during the library  
300 preparation process, resulting in possible sequencing bias.

301 Males and females also show significant differences in the distribution of CpG methylation  
302 levels across genomic features (two-way ANOVA, interaction between genomic feature and sex;  $F =$   
303  $316.54$ ,  $p < 0.001$ , Fig.3c). As we have previously shown using the female data in Lewis *et al.* (2020)  
304 *P. citri* females have unusual patterns of DNA methylation compared to other insect species; we  
305 confirm that promoters, exons 1-3 and transposable elements (TEs) have significantly higher levels  
306 of DNA methylation compared to exons 4+ and introns (Fig.3c, Supplementary 1.0.8). We have  
307 found this is also the case for males, however, males show significantly higher levels of methylation  
308 than females in all features except for promoters (Supplementary 1.0.8). Additionally, we also found  
309 high levels of intergenic methylation in both sexes, which, along with promoter and TE methylation  
310 is highly unusual in insect species (Bewick *et al.*, 2019).

311 In order to determine the distribution of methylation levels across features, we binned features  
312 into four categories: highly methylated ( $>0.7$ ), medium levels of methylation ( $0.3-0.7$ ), lowly  
313 methylated ( $0-0.3$ ) and no methylation, and plotted the number of features which fall into each bin

314 per sex. We found that females show a more bimodal pattern of methylation and have significantly  
315 more features that show a weighted methylation level  $>0.7$ . For example, in the promoter region  
316 female  $n = 1454$  and male  $n = 303$  (Test of equal proportions,  $q < 0.001$ , Fig.3d) and in exons 1-3  
317 female  $n = 1815$  and male  $n = 366$  (Test of equal proportions,  $q < 0.001$ , Fig.3d). Females also show  
318 significantly more genes with zero methylation in these features than males (Supplementary 2.0,  
319 Table S1.). This shows that the higher overall levels of genome methylation in males are driven  
320 by a larger number of lowly methylated features (Supplementary 2.0 Fig.S1 and S2), suggestive of  
321 uniform low levels of DNA methylation across the genome.



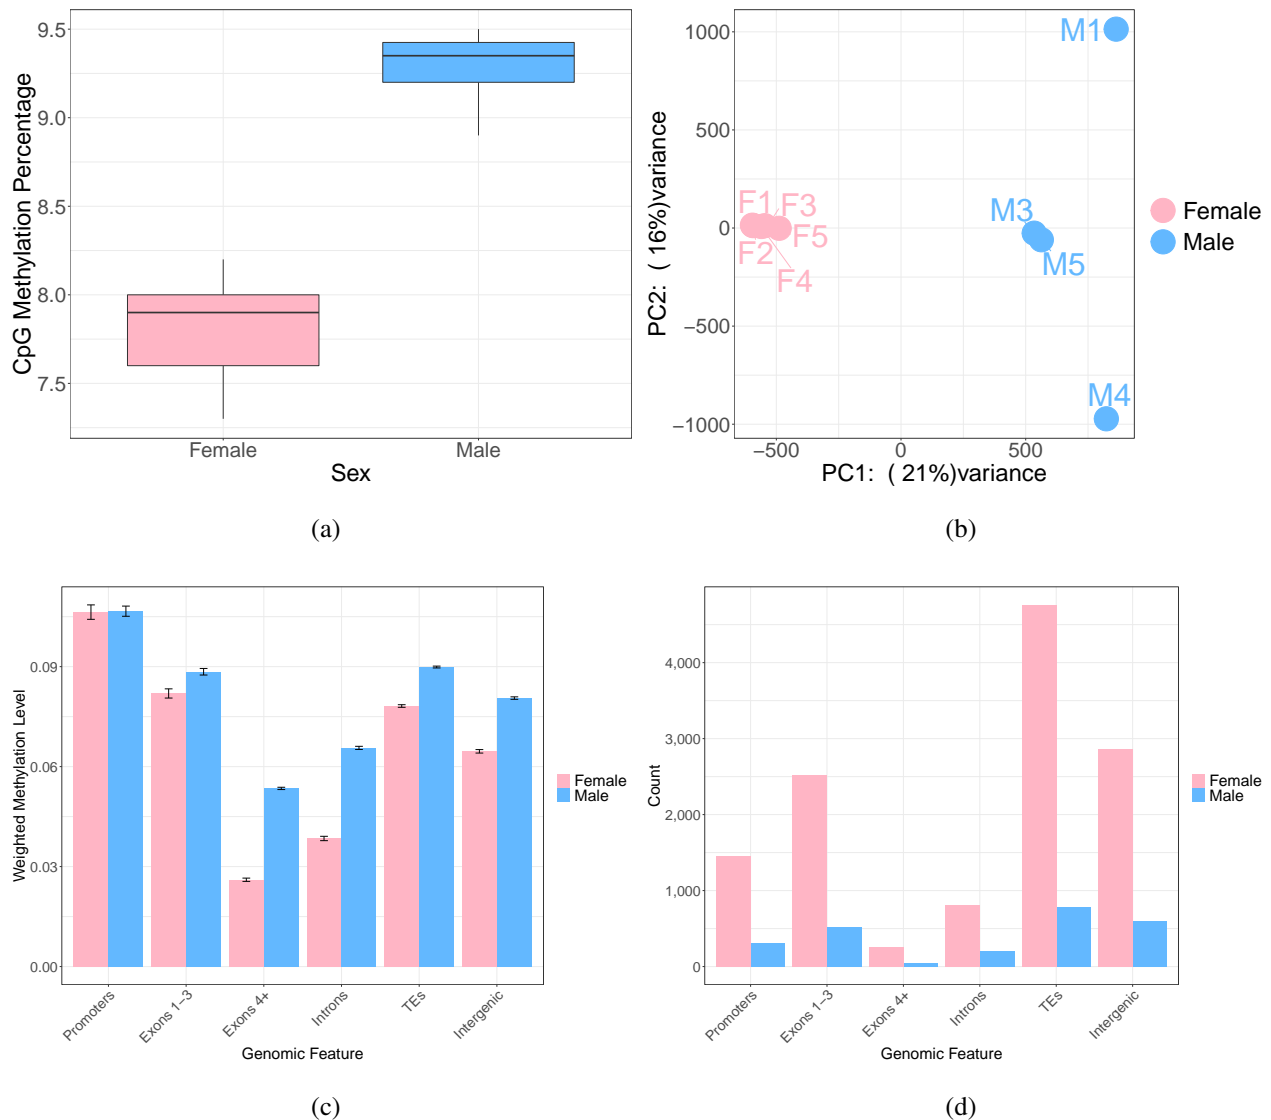

Figure 3: (a) Boxplot of the mean single-site methylation level in a CpG context for female and male replicates. (b) PCA plot generated by methylKit using per site CpG methylation levels. (c) The mean weighted methylation level for each genomic feature by sex, the error bars represent 95% confidence intervals of the mean. (d) Bar plot of the total number of genomic features which have a weighted methylation  $>0.7$  in each sex.

322 Due to the bimodal nature of female DNA methylation, we hypothesised that genes with  
323 different levels of methylation may be involved in different functions in males and females. For  
324 example, high levels of DNA methylation in insects has been associated with highly expressed  
325 housekeeping genes (Provataris *et al.*, 2018). Indeed, we found that genes with different levels of

326 promoter and exon methylation are enriched for different functions. Highly methylated genes (>0.7  
327 weighted methylation) in males and females are enriched for metabolic and core cellular processes  
328 (Supplementary 1.0.9) suggesting at least some highly methylated genes may be housekeeping genes.  
329 Genes with medium levels of methylation (0.3-0.7 weighted methylation) are also enriched for  
330 metabolic processes. Genes with low levels of methylation (0-0.3 weighted methylation) contain a  
331 large and general variety of terms. Unmethylated genes have enriched GO terms for protein-related  
332 processes. Additionally, three out of nine enriched GO terms for genes with no exon methylation  
333 in males are related to mRNA splice site selection (GO:0006376, GO:0000398, GO:0000375);  
334 these terms are not enriched for genes with no exon methylation in females. This suggests DNA  
335 methylation could play a functional role in alternative splicing in males.

### 336 **Sex-specific DNA methylation: gene-level**

337 There were 3,660,906 CpG sites found in all replicates with a minimum coverage of 10X. 75.8% of  
338 these were classed as methylated in at least one sample by a binomial test and were then used for  
339 differential methylation analysis. A total of 182,985 CpGs were classed as differentially methylated  
340 between males and females ( $q < 0.01$  and a minimum percentage difference of 15%), which is around  
341 5% of all CpGs in the genome. The majority of these sites are located in exons 1-3, promoters and  
342 TEs (Fig.4a). Exons 1-3 have the highest density of differentially methylated CpGs, followed by  
343 promoters and then TEs (Supplementary 2.0 Fig.S3)

344 Due to the unusual occurrence of promoter methylation in *P. citri*, we investigated sex-specific  
345 differences in promoter methylation and exon 1-3 methylation, separately. We find 2,709 genes with  
346 a differentially methylated promoter (minimum three differentially methylated CpGs and a minimum  
347 overall weighted methylation difference of 15%) between males and females and 2,736 genes with  
348 differentially methylated exons 1-3 (Supplementary 1.1.0). A significantly higher number of genes  
349 with differential promoter methylation were hypermethylated in females compared to males (2,645 in  
350 females and 64 in males, chi-squared goodness of fit,  $X^2 = 2459$ ,  $df = 1$ ,  $p < 0.001$ , Fig.4b and

351 4c). This was also the case for genes with differential exon methylation, with 2,709 hypermethylated  
352 in females and 33 hypermethylated in males (chi-squared goodness of fit,  $X^2 = 2611.6$ ,  $df =$   
353  $1$ ,  $p < 0.001$ , Fig.4b and 4d). In females, there is also a significant overlap of genes showing both  
354 hypermethylation of the promoter region and exons 1-3 (hypergeometric test,  $p < 0.001$ , Fig.4b).

355 As males show mostly low-to-medium levels of methylation throughout the genome, we  
356 analysed the distribution of methylation levels for each feature determined as differentially methylated.  
357 We found that the average level of methylation in males for male hypermethylated promoters is  $0.12 \pm$   
358  $0.07$  (mean  $\pm$  standard deviation) and for exons is  $0.14 \pm 0.12$  (Supplementary 2.0, Fig.S4a and S4b),  
359 meaning the minimum 15% threshold difference applied translates into a small actual difference in  
360 methylation between males and females. Female hypermethylated sites were confirmed to show a  
361 full range of levels (Supplementary 2.0, Fig.S4a and S4b). The average level of female methylation  
362 for female hypermethylated promoters was  $0.7 \pm 0.18$  and for exons was  $0.73 \pm 0.15$ . Whilst the  
363 differential methylation analysis conducted here is particularly stringent and in line with previous  
364 work on non-model insect species (e.g. Mathers *et al.*, 2019; Marshall *et al.*, 2019; Arsenault *et al.*,  
365 2018), male hypermethylated sites should be interpreted with care.

366 In females, GO terms enriched for genes with hypermethylated promoters and exons were  
367 similar, mostly metabolic and DNA related processes such as, "*DNA integration*" (GO:0015074)  
368 and "*DNA replication*" (GO:0006260) (Supplementary 1.1.1). In males, only one GO term was  
369 enriched for genes with hypermethylated promoters, "*protein prenylation*" (GO:0018342). GO terms  
370 enriched for genes with hypermethylated exons in males were more diverse, including: "*response to*  
371 *pheromone*" (GO:0019236) (Supplementary 1.1.1).

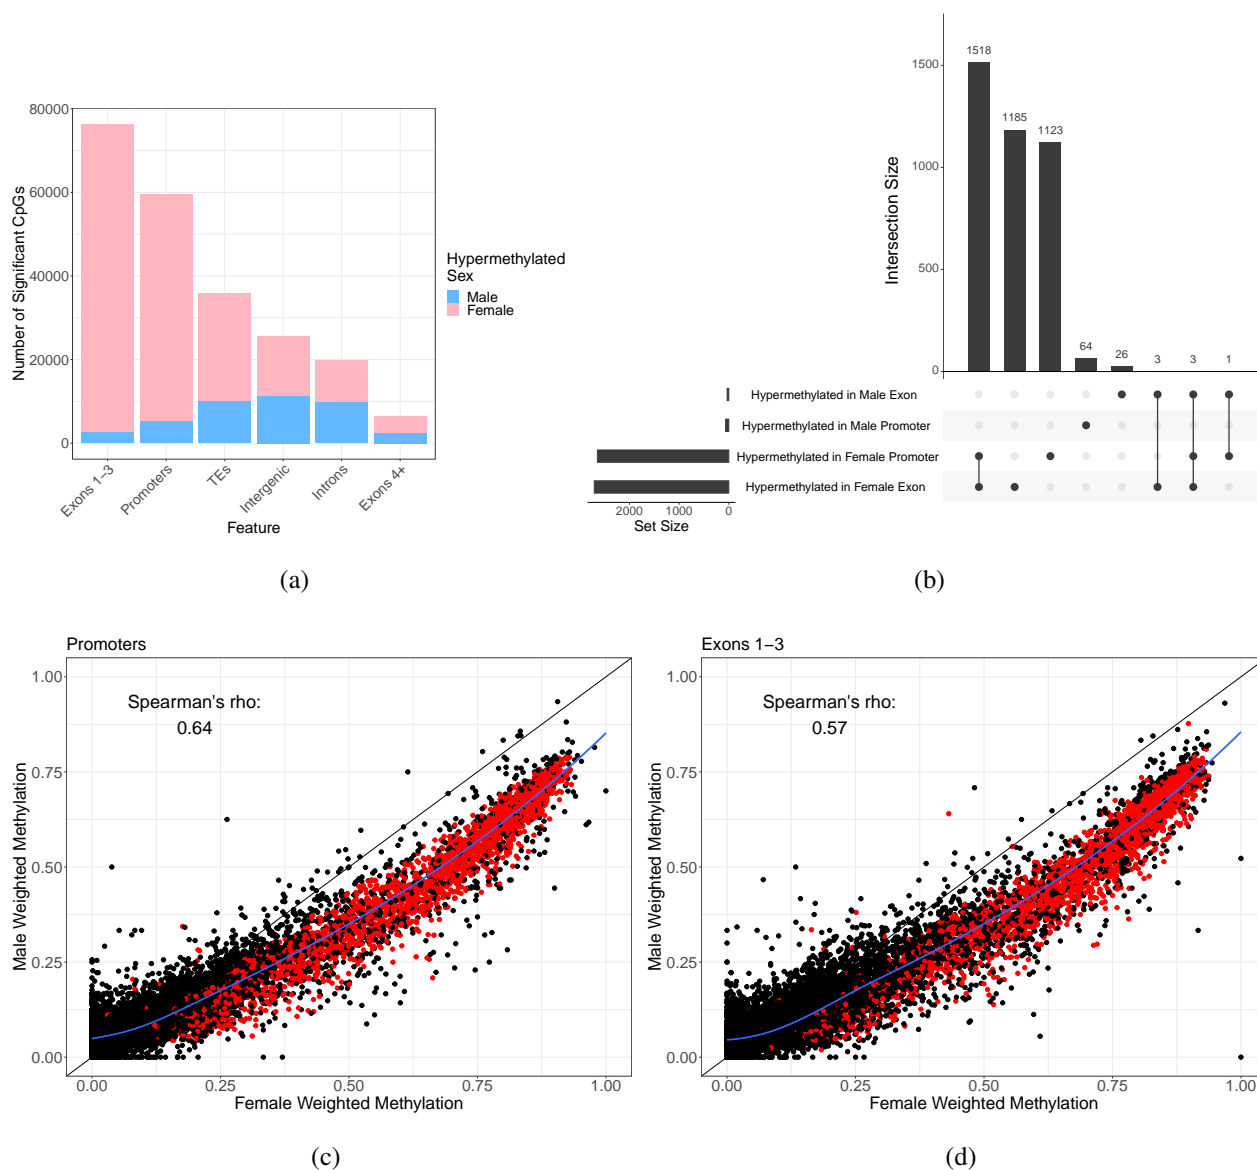

Figure 4: (a) Component bar plot showing the number of differentially methylated CpGs per genomic feature per sex. (b) UpSet plot showing the overlap between genes which are hypermethylated in either males or females. The set size indicates the total number of genes per group. The intersection size shows how many overlap or are unique to each group. Overlaps are shown by joined dots in the bottom panel, a single dot refers to the number of unique genes in the corresponding group. (c) and (d) scatter plots of the weighted methylation level of promoters and exons respectively. Each dot represents one promoter or one exon, the red dots are those which are significantly differentially methylated. The blue line represents a LOESS regression with the shaded grey area representing 95% confidence areas.

## 372 **Relationship of DNA methylation and expression**

373 Gene body DNA methylation is reported to positively correlate with gene expression in a number  
374 of insect species (Foret *et al.*, 2009; Bonasio *et al.*, 2012; Wang *et al.*, 2013; Glastad *et al.*, 2016;  
375 Marshall *et al.*, 2019). However, *P. citri* females show a negative relationship as higher methylation  
376 is correlated with lower gene expression (Lewis *et al.*, 2020). We explored this relationship further  
377 by examining both exon 1-3 and promoter methylation in males and females. On a single gene level,  
378 higher promoter methylation is significantly associated with lower gene expression (linear model:  
379  $df = 63932$ ,  $t = -10.44$ ,  $p < 0.001$ , Fig.5a and 5b). This is the case for both males and females as  
380 there is no interaction between sex and methylation level (two-way ANOVA:  $F_{2,3} = 0.265$ ,  $p = 0.606$ ).  
381 However, as there are few sites with high methylation in males ( $>0.75$ ) this trend is curtailed. The  
382 same relationship is found between gene expression and methylation of exon 1-3 (Supplementary  
383 2.0: Fig.S5a and S5b).

384 On a genome-wide scale the relationship between gene expression and methylation becomes  
385 more apparent (Fig.5c). Genes with no promoter methylation and low levels of promoter methylation  
386 have significantly higher expression levels compared to genes with medium and high promoter  
387 methylation (linear model: low methylation bin:  $df = 63930$ ,  $t = 4.93$ ,  $p < 0.001$ , no methylation bin:  
388  $df = 63930$ ,  $t = 4.047$ ,  $p < 0.001$ , Fig.5d). Again, there is no interaction between sex and methylation  
389 bin (two-way ANOVA:  $F_{4,7} = 0.998$ ,  $p = 0.392$ ). The results for exon 1-3 methylation are similar,  
390 however, only the low methylation bin has significantly higher expression than genes with medium,  
391 high or no exon 1-3 methylation (Supplementary 2.0: Fig.S5c and S5d).

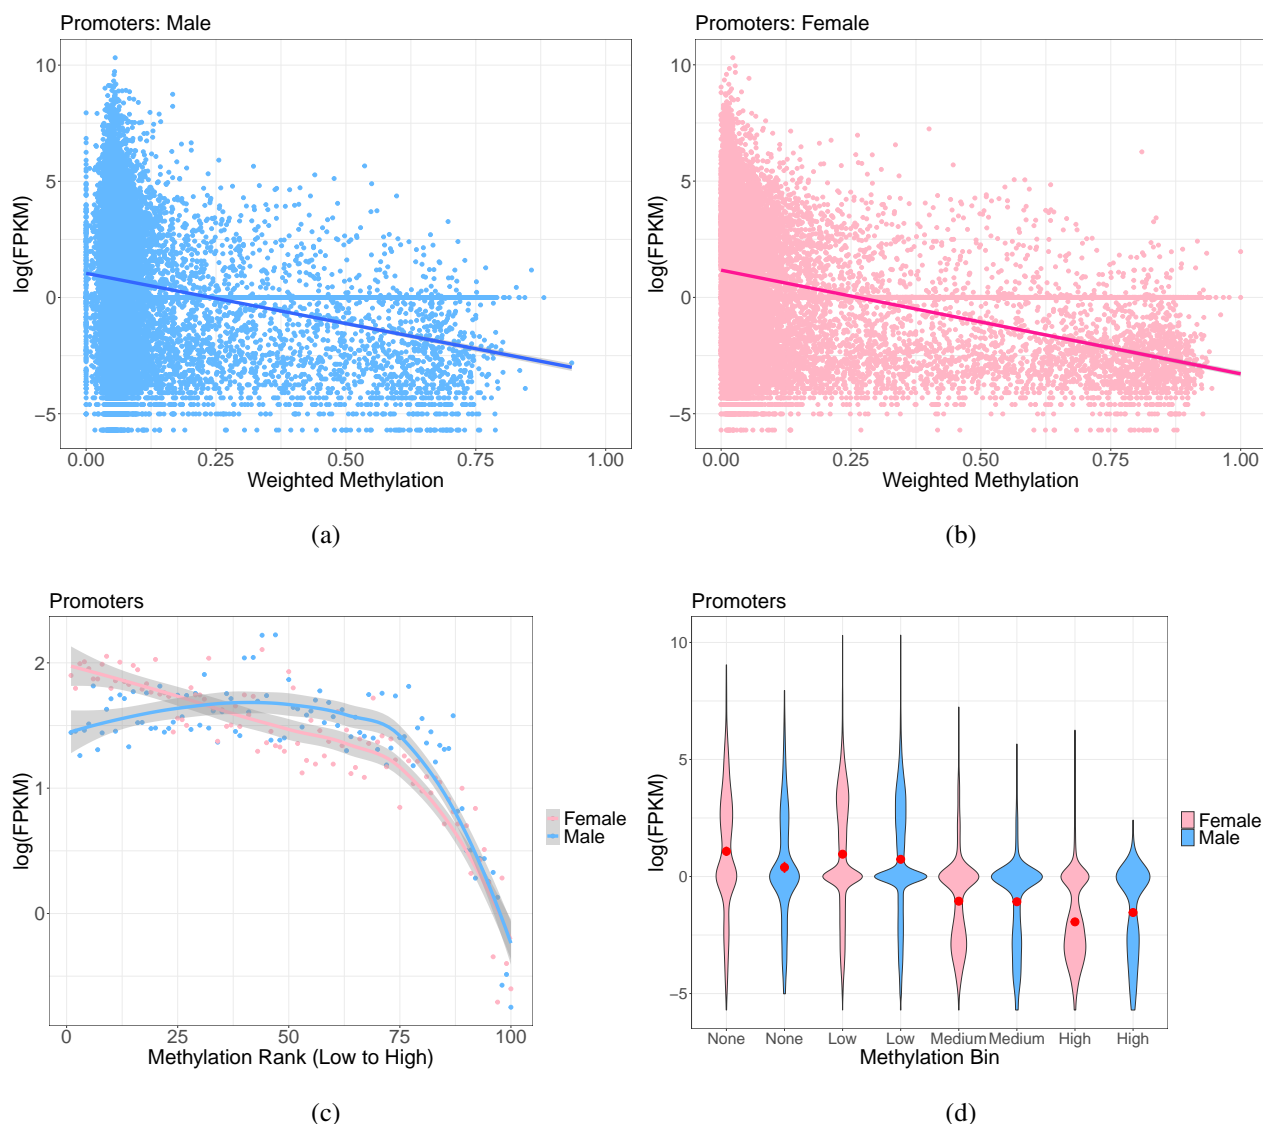

Figure 5: (a) and (b) scatter graphs of expression levels of every gene plotted against the mean weighted methylation level across replicates of each gene's promoter region for males and females respectively. Each point represents one gene. The lines are fitted linear regression with the grey areas indicating 95% confidence intervals. (c) Genes were binned by mean weighted methylation level of the promoter region across replicates and the mean expression level of each bin as been plotted for males and females. The lines are LOESS regression lines with the grey areas indicating 95% confidence areas. (d) Violin plots showing the distribution of the data via a mirrored density plot, meaning the widest part of the plots represent the most genes. Weighted methylation level per promoter per sex, averaged across replicates, was binned into four categories, no methylation, low ( $>0-0.3$ ), medium ( $0.3-0.7$ ), and high ( $0.7-1$ ). The red dot indicates the mean with 95% confidence intervals.



## 392 **Relationship of differential DNA methylation and differential expression**

393 If DNA methylation is a causative driver of changes in gene expression we would expect that  
394 differentially methylated genes between sexes are also differentially expressed. Given that higher  
395 methylation is associated with lower expression in this species, we would also expect that down-  
396 regulation of gene expression is associated with higher methylation. However, on a single gene level,  
397 we found there is no clear relationship between the level of differential promoter methylation and the  
398 level of differential expression of the corresponding gene (Fig.6a). This is also the case for exon 1-3  
399 methylation (Supplementary 2; Fig.S6a).

400 Additionally, genes that are hypermethylated in female promoter regions are enriched for genes  
401 that show significant expression bias in both females (overlapping genes = 113, hypergeometric test  
402 with bonferroni correction,  $p < 0.001$ ) and males (overlapping genes = 92, hypergeometric test with  
403 bonferroni correction,  $p = 0.024$ ). Genes that are hypermethylated in female exons 1-3 are enriched  
404 for genes with just female biased expression, the opposite of our prediction (overlapping genes =  
405 138, hypergeometric test with bonferroni correction,  $p < 0.001$ , Supplementary 2: Table S2). Finally,  
406 male hypermethylated genes are not significantly enriched for any genes which show sex-biased  
407 expression but male hypermethylated promoters are enriched for unbiased genes (overlapping genes  
408 = 14, hypergeometric test with bonferroni correction,  $p = 0.021$ , Supplementary 2: Table S2).  
409 Therefore, whilst genome-wide higher methylation is correlated with lower expression, this trend  
410 is not replicated on a single gene basis, indicating *cis*-acting DNA methylation does not drive  
411 differences in gene expression between the sexes.

412 We next explored general expression levels of differentially methylated genes. We found  
413 that genes with hypermethylated promoters in females show significantly lower levels of expression  
414 compared to those with non-differentially methylated promoters (Tukey post-hoc:  $t = -2.756$ ,  $p < 0.05$ ,  
415 Fig.6b). Interestingly, the expression levels of these female hypermethylated genes are similar in  
416 both sexes (two-way ANOVA for the interaction of sex and differentially methylated category:  $F_{3,5} =$

417 0.013,  $p = 0.987$  Fig.6b). The expression levels of genes which have hypermethylated promoters in  
418 males appear similar to genes with non-differentially methylated promoters and are not significantly  
419 different to those with female hypermethylated promoters (Tukey post-hoc:  $t = 0.642$ ,  $p = 0.782$ ,  
420 Fig.6b). The same relationships are observed when genes with differentially methylated exons are  
421 assessed (Supplementary 2: Fig.S6b).

422 We then assessed the overall methylation levels of differentially expressed genes. We found  
423 the average promoter methylation level of differentially expressed genes is higher than for unbiased  
424 genes in both sexes (linear model:  $df = 27375$ ,  $t = -10.136$ ,  $p < 0.001$ , Fig.6c). The same differences  
425 are also observed with exon 1-3 methylation (Supplementary 2: Fig.S6c). We then checked to see if  
426 a specific set of sex-biased genes, such as those which are sex-limited, drive this overall methylation  
427 difference observed. We found no significant difference in methylation between biased, extremely  
428 biased and sex-limited categories. We also found the pattern of higher male promoter/exon 1-3  
429 methylation compared to female methylation is the same in most cases (Supplementary 2: Fig.S7a  
430 and S7b). Finally, it is worth noting we also found annotated genes which were not present in the  
431 RNA-Seq data set had considerably higher methylation levels in males and females compared to  
432 genes which were expressed in either sex (Supplementary 2: Fig.S8a and S8b).

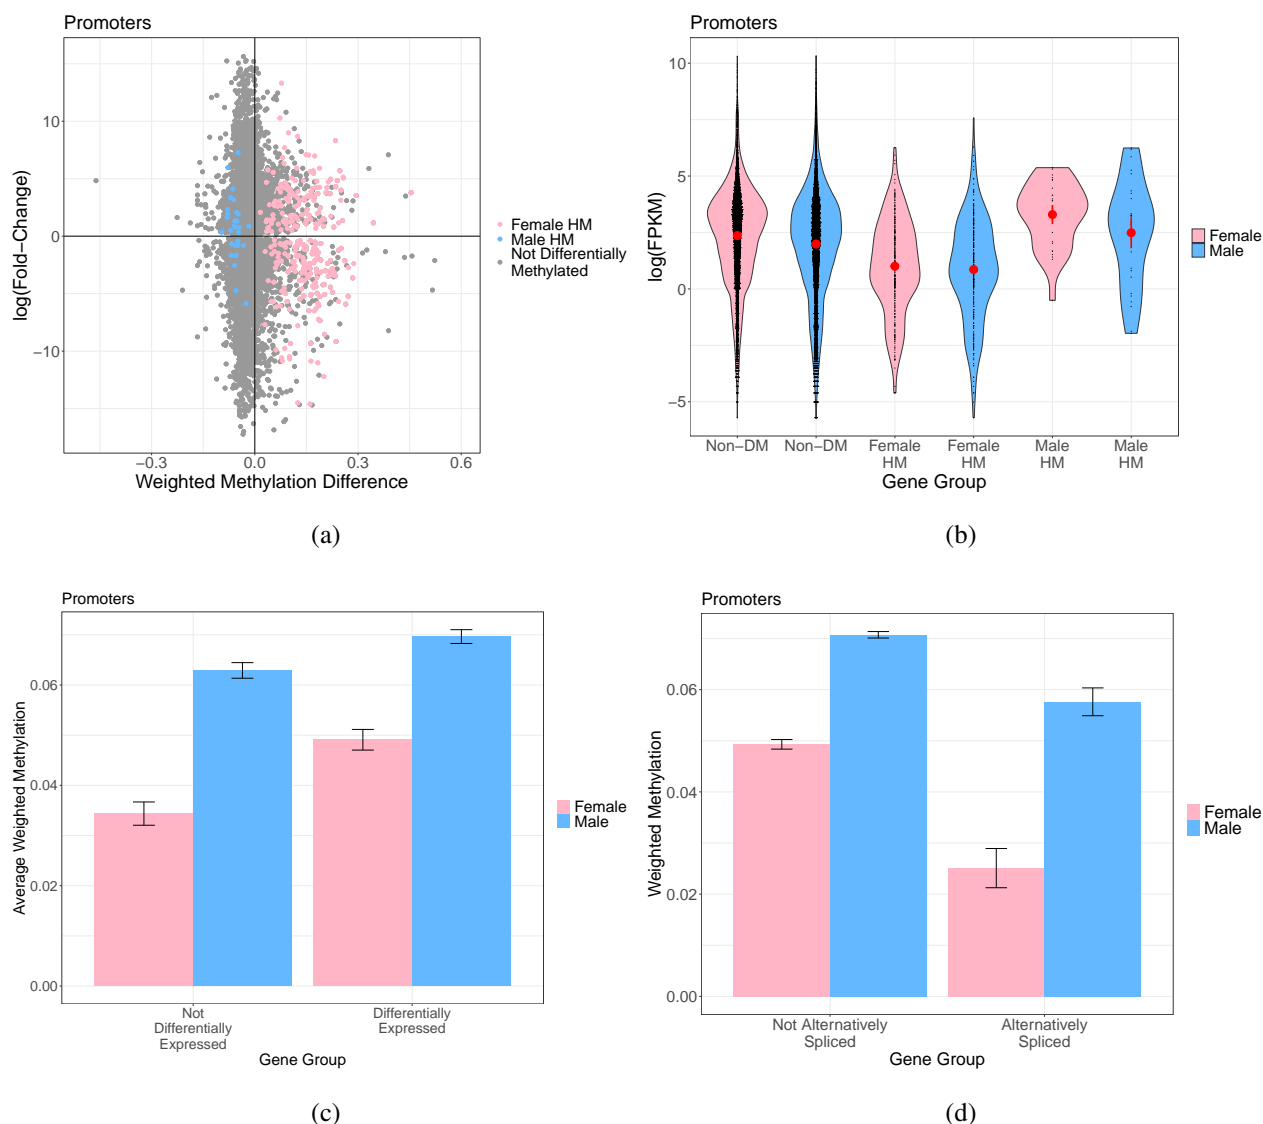

Figure 6: (a) Scatter plot of the weighted methylation difference between sexes (mean female weighted methylation minus mean male weighted methylation) for promoters plotted against the log fold-change in gene expression. A log fold-change greater than zero represents over expression in females. Each point represents a single gene. Blue points are genes which have significant male promoter hypermethylation and pink points are genes which have significant female promoter hypermethylation. (b) Violin plot of the expression levels of genes which are not differentially methylated between sexes (Non-DM) or which are hypermethylated (HM) in either females or males. Each black point is a gene. The red dot represents the mean with 95% confidence intervals. (c) Bar plot of the mean weighted methylation level of the promoter regions for differentially expressed genes and unbiased genes. Error bars represent 95% confidence intervals of the mean. (d) Bar plot of the mean weighted methylation level of promoter regions for genes which are alternatively spliced or not. Error bars represent 95% confidence intervals of the mean.

## 433 **Relationship of DNA methylation and alternative splicing**

434 Exonic DNA methylation has been associated with alternative splicing in some insect species  
435 (Bonasio *et al.*, 2012; Li-Byarlay *et al.*, 2013; Marshall *et al.*, 2019). Therefore, we tested for a  
436 relationship between DNA methylation and sex-specific alternative splicing in *P. citri*. We found that  
437 unlike differentially expressed genes, the promoter methylation levels of alternatively spliced genes  
438 are lower than non-alternatively spliced genes (linear model:  $df = 27612$ ,  $t = -3.772$ ,  $p < 0.001$ ). The  
439 same pattern is also observed with exon 1-3 methylation (Supplementary 2: Fig.S6d). Additionally,  
440 alternatively spliced genes which also show sex-specific expression bias do not significantly differ in  
441 their promoter or exon 1-3 methylation levels compared to alternatively spliced genes which show  
442 unbiased expression (Supplementary 2: Fig.S7c and S7d).

443 We also then checked to see if alternatively spliced genes were also differentially methylated  
444 between sexes. We found only one significant overlap of genes which are both alternatively  
445 spliced and differentially methylated (Supplementary 2: Table S3), a single gene was common  
446 between alternatively spliced genes which show male expression bias and genes with male promoter  
447 hypermethylation (hypergeometric test with bonferroni correction,  $p = 0.034$ ). However, it is likely  
448 this overlap is significant due to the small gene lists rather than due to biological significance.

## 449 **Discussion**

450 In this study, we investigated the relationship between sex-specific gene expression and DNA  
451 methylation in the mealybug, *Planococcus citri*, a species with extreme sexual dimorphism and  
452 genomic imprinting (PGE). Our major findings include: the identification of vastly different genome-  
453 wide methylation profiles between the sexes, high levels of intergenic methylation - especially in  
454 males, and no relationship between differentially expressed genes and differentially methylated  
455 genes, indicating *cis*-acting DNA methylation does not regulate sex-specific differences in adult gene  
456 expression.

457 We hypothesise that the DNA methylation patterns we observe can be explained by several  
458 mechanisms acting simultaneously: 1) the higher and more even distribution of methylation across  
459 the male genome could be a cause or consequence of the heterochromatinization of the paternal  
460 genome in males, 2) the regulation of a subset of mostly non-sexually dimorphic genes through  
461 promoter/exon methylation in both sexes, 3) the hypermethylation of certain promoters and exons  
462 reducing expression in females, possibly to balance expression level between the sexes as a mechanism  
463 of ploidy compensation.

### 464 **PGE may explain uniform DNA methylation in males**

465 We have identified extreme sex-specific differences in DNA methylation across the genome of *P.*  
466 *citri*. Most notably, overall higher genome-wide methylation levels in males manifest as low, uniform  
467 levels across the genome in comparison to a more targeted bimodal pattern of DNA methylation  
468 in females. To our knowledge, this type of sex-specific pattern has not been reported in any other  
469 species to date. We have also confirmed promoter methylation in both sexes, which is highly unusual  
470 in insects (Lewis *et al.*, 2020). We hypothesise this pattern, along with the identification of intergenic  
471 DNA methylation, is a result of the unusual reproductive strategy employed by this species, paternal  
472 genome elimination. Males with PGE have approximately half of their genome in a heterochromatic

473 state (Hughes-Schrader, 1948; Brown and Nur, 1964; Bongiorno and Prantera, 2003; de la Filia *et al.*,  
474 2020). In mammals and plants, DNA methylation is associated with the formation of heterochromatin  
475 (Suzuki and Bird, 2008). Previous research has found DNA methylation differences between the  
476 paternal and maternal chromosomes in mealybug species, although studies do not agree upon which  
477 chromosome set shows higher levels of DNA methylation (Bongiorno *et al.*, 1999; Buglia *et al.*, 1999;  
478 Mohan and Chandra, 2005). It is therefore likely the differences in the pattern of DNA methylation  
479 between the sexes may be driven by the condensed paternal chromosomes in males. Future work  
480 utilising reciprocal crosses to identify parent-of-origin DNA methylation at base-pair resolution  
481 throughout the genome would further clarify the role of DNA methylation in chromosome imprinting  
482 in this species.

483         Whilst differences in DNA methylation have been associated with the different parental  
484 chromosomes, it is the modifications of histones which have been directly linked to the formation of  
485 heterochromatin in *P. citri* (reviewed in Prantera and Bongiorno, 2011). Most recently Bain (2019)  
486 showed that both the H3K9me3-HP1 and H3K27me3-PRC2 heterochromatin pathways are involved  
487 in the condensation of the paternal chromosomes in males. Additionally, non-CpG methylation is  
488 also thought to exist in mealybugs in a CpA and CpT context (Deobagkar *et al.*, 1982) and the genes  
489 coding for the necessary enzymatic machinery for these modifications have recently been identified  
490 in the mealybug *Maconellicoccus hirsutus* (Kohli *et al.*, 2020). Although we did not find methylation  
491 levels above 0.2% in any non-CpG context (Supplementary 1.0.7). These studies suggest PGE is  
492 likely mediated by multiple interactions between a variety of epigenetic mechanisms within the  
493 genome.

## 494 **DNA methylation in females may be involved in ploidy compensation**

495 Another striking pattern we observe is the hypermethylation of single CpG sites in female (compared to  
496 male) promoters and exons. Overall hypermethylation in females suggests DNA methylation in males  
497 and females may serve different functions. We hypothesise that one function of hypermethylation in



498 females could be to act as a mechanism of ploidy compensation, as due to paternal chromosome  
499 silencing, most genes show haploid expression in males (de la Filia *et al.*, 2020). There is evidence  
500 for possible ploidy compensation via DNA methylation in other insects. Elevated DNA methylation  
501 levels in haploid males of the fire ant, *Solenopsis invicta*, are suggested to be indicative of regulatory  
502 pressures associated with the single-copy state of haploid loci (Glastad *et al.*, 2014). The aphid  
503 *Myzus persicae*, also shows male hypermethylation on the X chromosome which appears as a single  
504 copy in males (Mathers *et al.*, 2019). Although, it should be noted female aphids show much higher  
505 DNA methylation in the autosomes which are diploid in both sexes. However, it known in mammals  
506 that DNA methylation serves multiple functions in the genome (e.g. Edwards *et al.*, 2017) and this  
507 has also been suggested to be the case in insects with the function of DNA methylation potentially  
508 changing depending on the genomic context (Glastad *et al.*, 2018). In the examples noted above  
509 higher methylation has been identified in the sex/chromosome which is in the haploid state. DNA  
510 methylation in these species is associated with elevated, stable gene expression (Mathers *et al.*, 2019;  
511 Hunt *et al.*, 2013), suggesting methylation in these examples may serve to increase expression levels  
512 to compensate for single gene copies. We find a negative relationship between DNA methylation  
513 and gene expression in *P. citri*, suggesting higher methylation in females may serves to decrease  
514 expression of certain genes to mirror the haploid expression levels of males. This is further supported  
515 by our finding that female hypermethylated genes show overall similar expression levels in both  
516 females and males. To test this idea the expression levels of non-sex-biased genes from each parental  
517 chromosome set in both males and females should be assessed. Balanced expression levels would  
518 suggest some form of ploidy compensation.

519         We find no consistent overlap between differentially methylated genes and differentially  
520 expressed genes. This suggests that *cis*-acting DNA methylation is not regulating sex-specific gene  
521 expression. However, if DNA methylation does indeed play a role in ploidy compensation we would  
522 expect to see no overlap with differentially expressed genes. These findings further support the idea  
523 that DNA methylation is involved in chromosome-wide processes, such as paternal chromosome

524 condensation in males and possibly ploidy compensation in females. Indeed, a recent RNAi study  
525 which knocked down *DNMT1* in the mealybug *Phenacoccus solenopsis*, found phenotypic changes in  
526 males and females, with females changing colour and losing their waxy coating and males displaying  
527 wing abnormalities (Omar *et al.*, 2019). This supports this idea that DNA methylation is involved in  
528 the generation of sex-differences in mealybugs. However, another RNAi study in the Hemipteran,  
529 *Oncopeltus fasciatus*, revealed that depletion of DNA methylation did not result in changes in gene  
530 or transposable element expression but did lead to aberrant egg production and follicle development  
531 (Bewick *et al.*, 2019). Thus, suggesting a functional role for DNA methylation that is independent to  
532 specific gene expression. It is also worth noting that previous work in insects has found conflicting  
533 evidence for the role of DNA methylation in differential gene expression. Wang *et al.* (2015) found  
534 no correlation between methylation and sex-specific expression in a species of *Nasonia*. Whereas,  
535 Mathers *et al.* (2019) found differentially methylated genes between aphid sexes were enriched for  
536 differentially expressed genes. Future experimental validation, such as in Omar *et al.* (2019) and  
537 Bewick *et al.* (2019), exploring specifically the functional role of methylation in regulating gene  
538 expression in diverse insect species is sorely needed.

### 539 **Sex-specific expression and splicing mirror extreme sexual dimorphism**

540 In addition to our key findings above we have also identified sex-specific gene expression and  
541 alternative splicing. *P. citri* have no sex chromosomes meaning that males and females share the same  
542 genetic complement (Hughes-Schrader, 1948). Thus, the observed sexual dimorphism exhibited  
543 must be a consequence of differences in gene expression and splicing between the sexes. Indeed, we  
544 found that 54% of genes show sex-biased expression, including a subset of genes that are extremely  
545 sex-biased and sex-limited. We found that both male- and female-biased genes are involved in  
546 core biological processes. Sex-limited genes are likely important in the phenotypic sex differences  
547 observed in *P. citri*, including sensory related male-limited genes that may be involved in mate  
548 recognition through pheromones (Bierl-Leonhardt *et al.*, 1981). *Nasonia* males also show extreme

549 sex-biased expression of pheromone genes (Wang *et al.*, 2015). The large number of differentially  
550 expressed genes we have identified reflects the extreme sexual dimorphism shown in this species  
551 (Fig.1).

552 We also identified differentially alternatively spliced genes between the sexes and found a  
553 significant number of these show male-biased expression. Genome-wide sex-specific alternative  
554 splicing has also been identified in aphids (Grantham and Brisson, 2018) and other insects (e.g.  
555 Glastad *et al.*, 2016; Price *et al.*, 2018; Rago *et al.*, 2020). Specifically, Grantham and Brisson (2018)  
556 found that differentially expressed and alternatively spliced genes had similar GO term enrichment  
557 and they suggest both mechanisms serve to independently generate phenotypic differences between  
558 the sexes. Given the significant overlap of differentially expressed and differentially alternatively  
559 spliced genes we have found here, it may be that *P. citri* utilises expression regulation and alternative  
560 splicing of many of the same pathways to generate phenotypic sex differences. Additionally, Gibilisco  
561 *et al.* (2016) have shown male and female *Drosophila* utilise alternative splicing differently - males  
562 increase diversity in their gene expression profiles by expressing more genes and females express  
563 less genes but use more alternative transcripts. In *P. citri*, we found generally more female-biased  
564 genes compared to male-biased genes but more male-biased alternatively spliced genes, showing  
565 that *P. citri* sexes also employ different mechanisms to generate sex-specific phenotypes.

566 Surprisingly, we did not find any genes orthologous to the *Drosophila doublesex* gene to be  
567 alternatively spliced. Alternative splicing of *doublesex* is ubiquitous in holometabolous insects,  
568 whereas male-biased expression rather than alternative splicing has been detected in some crustaceans  
569 (Kato *et al.*, 2011; Li *et al.*, 2018) and a mite (Pomerantz and Hoy, 2015), indicating male-biased  
570 expression was likely the ancestral mode of *doublesex* sex-differentiation (Wexler *et al.*, 2019).  
571 Recently, Wexler *et al.* (2019) explored the role of *doublesex* orthologs in three hemimetabolous  
572 insect species and concluded the splicing method of sexual differentiation has evolved within the  
573 hemipteran order. One of the identified *doublesex* orthologs (*g36454*) in *P. citri* shows male biased  
574 expression indicating a possible ancestral function. Although it is worth noting expression levels of

575 this gene are low in both sexes. Improved functional annotation of the current genome build may  
576 uncover isoforms not currently identified. Additionally, future work is needed to experimentally  
577 validate the role *g36454* may have in sex differentiation.

## 578 **Future Considerations**

579 It is important to bear in mind that the differences we describe in this study are found in adult whole  
580 body samples and thus do not capture expression and DNA methylation biases between tissues and  
581 developmental stages, which are known to vary greatly (Harrison *et al.*, 2015; Grath and Parsch,  
582 2016). Recently both sex-specific and developmental stage specific expression has been identified  
583 in other mealybug species: *Phenacoccus solenopsis* (Omar *et al.*, 2019), *Planococcus kraunhiae*  
584 (Muramatsu *et al.*, 2020) and *Maconellicoccus hirsutus* (Kohli *et al.*, 2020). With Kohli *et al.* (2020)  
585 identifying sex-specific expression of numerous epigenetic regulators, including the genes *SMYDA-4*  
586 and *SDS3* which are up-regulated in males and *SMYD5* and *nucleoplasmin* which are up-regulated in  
587 females. These genes are thought to be involved in heterochromatin formation via the methylation  
588 of various histones (Kohli *et al.*, 2020). The presence of histone marks is known to differ between  
589 sexes in mealybugs, with Ferraro *et al.* (2001) identifying higher histone acetylation in the paternal  
590 chromosome of *P. citri* males. The presence of such differences in adults may contribute to the  
591 extreme sexual dimorphism exhibited by mealybugs. In order to further understand the role of  
592 sex-specific expression, DNA methylation and other epigenetic modifications in *P. citri*, RNA-seq,  
593 ChIP-Seq/CUT&Tag and WGBS of specific tissues and developmental stages are needed.

## 594 **Conclusions**

595 Overall, this study has shown striking differences in the DNA methylome of male and female *P. citri*,  
596 unlike any previously described sex-specific differences in insects. It is likely these differences are  
597 due to the unusual reproductive strategy of this species, paternal genome elimination. Based on our  
598 key finding of a lack of direct association between differential DNA methylation and differential gene

599 expression, paired with recent findings by de la Filia *et al.* (2020) that show males display mostly  
600 haploid gene expression, we hypothesise DNA methylation may play a *trans*-acting role in ploidy  
601 compensation in this species, although this is speculation and requires experimental testing. Finally,  
602 we have identified a large number of differentially expressed genes between sexes mirroring the  
603 extreme sexual-dimorphism exhibited in this species and we have found no evidence for sex-specific  
604 alternative splicing of *doublesex* orthologs in *P. citri*. In addition to these key findings this study lays  
605 the groundwork for future research exploring the role of DNA methylation in genomic imprinting  
606 in insects as well as experimental validation studies to identify the interactions between multiple  
607 epigenomic mechanisms which may lead to such extreme sexual dimorphism and paternal genome  
608 elimination in this species.

## 609 **Acknowledgements**

610 We thank Peter Sarkies for valuable advice and discussion. This work was supported by the NERC  
611 grant: NE/K009516/1, the Royal Society Grant: RG160842 and a Wellcome Trust - Institutional  
612 Strategic Support Fund awarded to L.R. S.A.B. was supported by the BBSRC Eastbio DTP. H.M.  
613 was supported by the ERC starting grant 'PGErepro' awarded to L.R.

---

## 614 References

- 615 Akalin, A., Kormaksson, M., Li, S., Garrett-bakelman, F. E., Figueroa, M. E., Melnick, A., and  
616 Mason, C. E. 2012. methylKit: a comprehensive R package for the analysis of genome-wide DNA  
617 methylation profiles. *Genome Biology*, 13(R87).
- 618 Anders, S., Reyes, A., and Huber, W. 2012. Detecting differential usage of exons from RNA-seq  
619 data. *Genome Research*, 22(10): 2008–2017.
- 620 Andrews, S. 2010. Babraham Bioinformatics - FastQC A Quality Control tool for High Throughput  
621 Sequence Data. <http://www.bioinformatics.babraham.ac.uk/projects/fastqc/>.
- 622 Arsenault, S. V., Hunt, B. G., and Rehan, S. M. 2018. The effect of maternal care on gene expression  
623 and DNA methylation in a subsocial bee. *Nature Communications*, 9(3468).
- 624 Bain, S. A. 2019. *Epigenetic Mechanisms underlying Paternal Genome Elimination*. Ph.D. thesis,  
625 University of Edinburgh.
- 626 Benjamini, Y. and Hochberg, Y. 1995. Controlling the false discovery rate: a practical and powerful  
627 approach to multiple testing. *Journal of the Royal Statistical Society*, 57(1): 289–300.
- 628 Bewick, A. J., Vogel, K. J., Moore, A. J., and Schmitz, R. J. 2017. Evolution of DNA methylation  
629 across insects. *Molecular Biology and Evolution*, 34(3): 654–665.
- 630 Bewick, A. J., Sanchez, Z., McKinney, E. C., Moore, A. J., Moore, P. J., and Schmitz, R. J. 2019.  
631 Dnmt1 is essential for egg production and embryo viability in the large milkweed bug, *Oncopeltus*  
632 *fasciatus*. *Epigenetics and Chromatin*, 12(1): 1–14.
- 633 Bierl-Leonhardt, B. A., Moreno, D. S., Schwarz, M., Fargerlund, J. A., and Plimmer, J. R. 1981.  
634 Isolation, identification and synthesis of the sex pheromone of the citrus mealybug, *Planococcus*  
635 *citri* (risso). *Tetrahedron Letters*, 22(5): 389–392.
- 636 Bird, A. 2002. DNA methylation patterns and epigenetic memory. *Genes and Development*, 16:  
637 6–21.
- 638 Bird, A. P. 1986. CpG-rich islands and the function of DNA methylation. *Nature*, 321: 209–213.
- 639 Bonasio, R., Li, Q., Lian, J., Mutti, N. S., Jin, L., Zhao, H., Zhang, P., Wen, P., Xiang, H., Ding, Y.,  
640 Jin, Z., Shen, S. S., Wang, Z., Wang, W., Wang, J., Berger, S. L., Liebig, J. J., Zhang, G., and  
641 Reinberg, D. 2012. Genome-wide and caste-specific DNA methylomes of the ants *Camponotus*  
642 *floridanus* and *Harpegnathos saltator*. *Current Biology*, 22(19): 1755–1764.
- 643 Bongiorno, S. and Prantera, G. 2003. Imprinted facultative heterochromatization in mealybugs.  
644 *Genetica*, 117(2-3): 271–279.
- 645 Bongiorno, S., Cintio, O., and Prantera, G. 1999. The relationship between DNA methylation and  
646 chromosome imprinting in the Coccid *Planococcus citri*. *Genetics*, 151(4): 1471–1478.

- 
- 647 Bongiorno, S., Mazzuoli, M., Masci, S., and Prantera, G. 2001. Facultative heterochromatinization in  
648 parahaploid male mealybugs: Involvement of a heterochromatin-associated protein. *Development*,  
649 128(19): 3809–3817.
- 650 Brown, S. W. and Nelson-Rees, W. A. 1961. Radiation Analysis of a Lecanoid Genetic System.  
651 *Genetics*, 46(8): 983–1007.
- 652 Brown, S. W. and Nur, U. 1964. Heterochromatic Chromosomes in the Coccids. *Science*, 145(3628):  
653 130–136.
- 654 Buglia, G., Predazzi, V., and Ferraro, M. 1999. Cytosine methylation is not involved in the  
655 heterochromatinization of the paternal genome of mealybug *Planococcus citri*. *Chromosome*  
656 *Research*, 7(1): 71–73.
- 657 de la Folia, A. G., Mongue, A. J., Dorrens, J., Lemon, H., Laetsch, D. R., and Ross, L. 2020. Males  
658 that silence their father's genes: genomic imprinting of a complete haploid genome. *bioRxiv*,  
659 DOI:10.1101/2020.04.27.063396.
- 660 Deobagkar, D. N., Muralidharan, K., Devare, S. G., Kalghatgi, K. K., and Chandra, H. S. 1982.  
661 The mealybug chromosome system I: Unusual methylated bases and dinucleotides in DNA of a  
662 *Planococcus* species. *Journal of Biosciences*, 4(4): 513–526.
- 663 Dobin, A., Gingeras, T. R., and Spring, C. 2016. Mapping RNA-seq Reads with STAR Alexander.  
664 *Current Protocols in Bioinformatics*, (51): 1–11.
- 665 Edwards, J. R., Yarychivska, O., Boulard, M., and Bestor, T. H. 2017. DNA methylation and DNA  
666 methyltransferases. *Epigenetics and Chromatin*, 10(1): 1–10.
- 667 Ellegren, H. and Parsch, J. 2007. The evolution of sex-biased genes and sex-biased gene expression.  
668 *Nature Reviews Genetics*, 8(9): 689–698.
- 669 Falcon, S. and Gentleman, R. 2007. Using GOstats to test gene lists for GO term association.  
670 *Bioinformatics*, 23(2): 257–258.
- 671 Feng, S., Cokus, S. J., Zhang, X., Chen, P.-Y., Bostick, M., Goll, M. G., Hetzel, J., Jain, J., Strauss,  
672 S. H., Halpern, M. E., Ukomadu, C., Sadler, K. C., Pradhan, S., Pellegrini, M., and Jacobsen, S. E.  
673 2010. Conservation and divergence of methylation patterning in plants and animals. *Proceedings*  
674 *of the National Academy of Sciences*, 107(19): 8689–8694.
- 675 Ferraro, M., Buglia, G. L., and Romano, F. 2001. Involvement of histone H4 acetylation in the  
676 epigenetic inheritance of different activity states of maternally and paternally derived genomes in  
677 the mealybug *Planococcus citri*. *Chromosoma*, 110(2): 93–101.
- 678 Foret, S., Kucharski, R., Pittelkow, Y., Lockett, G. A., and Maleszka, R. 2009. Epigenetic regulation  
679 of the honey bee transcriptome: unravelling the nature of methylated genes. *BMC Genomics*,  
680 10(1): 472.



- 
- 681 Gibilisco, L., Zhou, Q., Mahajan, S., and Bachtrog, D. 2016. Alternative Splicing within and between  
682 *Drosophila* Species, Sexes, Tissues, and Developmental Stages. *PLoS Genetics*, 12(12): 1–19.
- 683 Glastad, K. M., Hunt, B. G., Yi, S. V., and Goodisman, M. a. D. 2014. Epigenetic inheritance and  
684 genome regulation: is DNA methylation linked to ploidy in haplodiploid insects? *Proceedings.*  
685 *Biological sciences / The Royal Society*, 281(1785): 20140411.
- 686 Glastad, K. M., Gokhale, K., Liebig, J., and Goodisman, M. A. D. 2016. The caste- and sex-specific  
687 DNA methylome of the termite *Zootermopsis nevadensis*. *Scientific Reports*, 6(37110).
- 688 Glastad, K. M., Hunt, B. G., and Goodisman, M. A. D. 2018. Epigenetics in Insects: Genome  
689 Regulation and the Generation of Phenotypic Diversity. *Annual Review of Entomology*, 64(1):  
690 185–203.
- 691 Grantham, M. E. and Brisson, J. A. 2018. Extensive differential splicing underlies phenotypically  
692 plastic aphid morphs. *Molecular Biology and Evolution*, 35(8): 1934–1946.
- 693 Grath, S. and Parsch, J. 2016. Sex-Biased Gene Expression. *Annual Review of Genetics*, 50(1):  
694 29–44.
- 695 Hall, E., Volkov, P., Dayeh, T., Esguerra, J. L. S., Salö, S., Eliasson, L., Rönn, T., Bacos, K., and  
696 Ling, C. 2014. Sex differences in the genome-wide DNA methylation pattern and impact on gene  
697 expression, microRNA levels and insulin secretion in human pancreatic islets. *Genome biology*,  
698 15(12): 522.
- 699 Harrison, M. C., Hammond, R. L., and Mallon, E. B. 2015. Reproductive workers show queenlike  
700 gene expression in an intermediately eusocial insect, the buff-tailed bumble bee *Bombus terrestris*.  
701 *Molecular ecology*, 24(12): 3043–3063.
- 702 Hothorn, T., Bretz, F., and Westfall, P. 2008. Simultaneous inference in general parametric models.  
703 *Biometrical Journal*, 50(3): 346–363.
- 704 Hughes-Schrader, S. 1948. Cytology of Coccids (Coccoidea-Hornoptera). *Advances in Genetics*, 2:  
705 127–203.
- 706 Hunt, B. G., Glastad, K. M., Yi, S. V., and Goodisman, M. A. D. 2013. Patterning and regulatory  
707 associations of DNA methylation are mirrored by histone modifications in insects. *Genome*  
708 *Biology and Evolution*, 5(3): 591–598.
- 709 Kato, Y., Kobayashi, K., Watanabe, H., and Iguchi, T. 2011. Environmental sex determination  
710 in the branchiopod crustacean *Daphnia magna*: Deep conservation of a Doublesex gene in the  
711 sex-determining pathway. *PLoS Genetics*, 7(3).
- 712 Kohli, S., Gulati, P., Maini, J., KV, S., Pandey, R., Scaria, V., Sivasubbu, S., Narang, A., and  
713 Brahmachari, V. 2020. Genome and transcriptome analysis of the mealybug *Maconellicoccus*  
714 *hirsutus*: A model for genomic Imprinting. *bioRxiv*, <https://doi.org/10.1101/2020.05.22.110437>.



- 715 Krueger, F. and Andrews, S. R. 2011. Bismark: A flexible aligner and methylation caller for  
716 Bisulfite-Seq applications. *Bioinformatics*, 27(11): 1571–1572.
- 717 Lewis, S. H., Ross, L., Bain, S. A., Pahita, E., Smith, S., Cordaux, R., Miska, E., Lenhard,  
718 B., Jiggins, F. M., and Sarkies, P. 2020. Widespread conservation and lineage-specific  
719 diversification of genome-wide DNA methylation patterns across arthropods. *bioRxiv*,  
720 <https://doi.org/10.1101/2020.01.27.920108>.
- 721 Lex, A., Gehlenborg, N., and Strobel, H. 2016. UpSet : Visualization of Intersecting Sets. *Europe*  
722 *PMC Funders Group*, 20(12): 1983–1992.
- 723 Li, S., Li, F., Yu, K., and Xiang, J. 2018. Identification and characterization of a *doublesex* gene  
724 which regulates the expression of insulin-like androgenic gland hormone in *Fenneropenaeus*  
725 *chinensis*. *Gene*, 649(July 2017): 1–7.
- 726 Li-Byarlay, H., Li, Y., Stroud, H., Feng, S., Newman, T. C., Kaneda, M., Hou, K. K., Worley,  
727 K. C., Elsik, C. G., Wickline, S. A., Jacobsen, S. E., Ma, J., and Robinson, G. E. 2013. RNA  
728 interference knockdown of DNA methyl-transferase 3 affects gene alternative splicing in the honey  
729 bee. *Proceedings of the National Academy of Sciences*, 110(31): 12750–12755.
- 730 Mank, J. E. 2009. Sex chromosomes and the evolution of sexual dimorphism: Lessons from the  
731 genome. *American Naturalist*, 173(2): 141–150.
- 732 Marshall, H., Lonsdale, Z. N., and Mallon, E. B. 2019. Methylation and gene expression differences  
733 between reproductive and sterile bumblebee workers. *Evolution Letters*, 3(5): 485–499.
- 734 Maschietto, M., Bastos, L. C., Tahira, A. C., Bastos, E. P., Euclides, V. L. V., Brentani, A., Fink, G.,  
735 De Baumont, A., Felipe-Silva, A., Francisco, R. P. V., Gouveia, G., Grisi, S. J. F. E., Escobar,  
736 A. M. U., Moreira-Filho, C. A., Polanczyk, G. V., Miguel, E. C., and Brentani, H. 2017. Sex  
737 differences in DNA methylation of the cord blood are related to sex-bias psychiatric diseases.  
738 *Scientific Reports*, 7: 1–11.
- 739 Mathers, T. C., Mugford, S. T., Percival-Alwyn, L., Chen, Y., Kaithakottil, G., Swarbreck, D.,  
740 Hogenhout, S. A., and van Oosterhout, C. 2019. Sex-specific changes in the aphid DNA methylation  
741 landscape. *Molecular Ecology*, 28(18): 4228–4241.
- 742 Mohan, K. N. and Chandra, H. S. 2005. Isolation and analysis of sequences showing sex-specific  
743 cytosine methylation in the mealybug *Planococcus lilacinus*. *Molecular Genetics and Genomics*,  
744 274(6): 557–568.
- 745 Muramatsu, M., Tsuji, T., Tanaka, S., Shiotsuki, T., Jouraku, A., Miura, K., Vea, I. M., and Minakuchi,  
746 C. 2020. Sex-specific expression profiles of ecdysteroid biosynthesis and ecdysone response genes  
747 in extreme sexual dimorphism of the mealybug *Planococcus kraunhiae* (Kuwana). *PLoS ONE*,  
748 15(4): 1–16.
- 749 Nelson-Rees, W. A. 1960. A study of sex predetermination in the mealy bug *Planococcus citri*  
750 (Risso). *Journal of Experimental Zoology*, 144(2): 111–137.

- 751 Omar, M. A., Ao, Y., Li, M., He, K., Xu, L., Tong, H., Jiang, M., and Li, F. 2019. The functional  
752 difference of eight chitinase genes between male and female of the cotton mealybug, *Phenacoccus*  
753 *solenopsis*. *Insect Molecular Biology*, 28(4): 550–567.
- 754 Omar, M. A., Li, M., Liu, F., He, K., Qasim, M., Xiao, H., Jiang, M., and Li, F. 2020. The roles of  
755 DNA methyltransferases 1 (DNMT1) in regulating sexual dimorphism in the cotton mealybug,  
756 *Phenacoccus solenopsis*. *Insects*, 11(2): 1–15.
- 757 Pomerantz, A. F. and Hoy, M. A. 2015. Expression analysis of *Drosophila doublesex*, *transformer-*  
758 *2*, *intersex*, *fruitless-like*, and *vitellogenin* homologs in the parahaploid predator *Metaseiulus*  
759 *occidentalis* (Chelicerata: Acari: Phytoseiidae). *Experimental and Applied Acarology*, 65(1):  
760 1–16.
- 761 Prantera, G. and Bongiorno, S. 2011. Mealybug Chromosome Cycle as a Paradigm of Epigenetics.  
762 *Genetics Research International*, 2011: 1–11.
- 763 Price, J., Harrison, M. C., Hammond, R. L., Adams, S., Gutierrez-Marcos, J. F., and Mallon, E. B.  
764 2018. Alternative splicing associated with phenotypic plasticity in the bumble bee *Bombus*  
765 *terrestris*. *Molecular Ecology*, 27(4): 1036–1043.
- 766 Provataris, P., Meusemann, K., Niehuis, O., Grath, S., and Misof, B. 2018. Signatures of DNA  
767 Methylation across Insects Suggest Reduced DNA Methylation Levels in Holometabola. *Genome*  
768 *biology and evolution*, 10(4): 1185–1197.
- 769 Quinlan, A. R. and Hall, I. M. 2010. BEDTools: A flexible suite of utilities for comparing genomic  
770 features. *Bioinformatics*, 26(6): 841–842.
- 771 Rago, A., Werren, J. H., and Colbourne, J. K. 2020. Sex biased expression and co-expression  
772 networks in development, using the hymenopteran *Nasonia vitripennis*. *PLoS Genetics*, 16(1):  
773 1–32.
- 774 Schultz, M. D., Schmitz, R. J., and Ecker, J. R. 2012. ‘Leveling’ the playing field for analyses of  
775 single-base resolution DNA methylomes. *Trends in Genetics*, 28(12): 583–585.
- 776 Supek, F., Bošnjak, M., Škunca, N., and Šmuc, T. 2011. Revigo summarizes and visualizes long  
777 lists of gene ontology terms. *PLoS ONE*, 6(7).
- 778 Sutherland, J. R. G. 1932. *Some Observations on the Common Mealybug, Pseudococcus citri* Risso.  
779 23rd-24th Annual Report Quebec Soc. Prot. Pl. 1930-32.
- 780 Suzuki, M. M. and Bird, A. 2008. DNA methylation landscapes: Provocative insights from  
781 epigenomics. *Nature Reviews Genetics*, 9(6): 465–476.
- 782 Thomas, G. W., Dohmen, E., Hughes, D. S., Murali, S. C., Poelchau, M., Glastad, K., Anstead,  
783 C. A., Ayoub, N. A., Batterham, P., Bellair, M., Binford, G. J., Chao, H., Chen, Y. H., Childers, C.,  
784 Dinh, H., Doddapaneni, H. V., Duan, J. J., Dugan, S., Esposito, L. A., Friedrich, M., Garb, J.,  
785 Gasser, R. B., Goodisman, M. A., Gundersen-Rindal, D. E., Han, Y., Handler, A. M., Hatakeyama,

- 786 M., Hering, L., Hunter, W. B., Ioannidis, P., Jayaseelan, J. C., Kalra, D., Khila, A., Korhonen,  
787 P. K., Lee, C. E., Lee, S. L., Li, Y., Lindsey, A. R., Mayer, G., McGregor, A. P., McKenna, D. D.,  
788 Misof, B., Munidasa, M., Munoz-Torres, M., Muzny, D. M., Niehuis, O., Osuji-Lacy, N., Palli,  
789 S. R., Panfilio, K. A., Pechmann, M., Perry, T., Peters, R. S., Poynton, H. C., Prpic, N. M., Qu, J.,  
790 Rotenberg, D., Schal, C., Schoville, S. D., Scully, E. D., Skinner, E., Sloan, D. B., Stouthamer, R.,  
791 Strand, M. R., Szucsich, N. U., Wijeratne, A., Young, N. D., Zattara, E. E., Benoit, J. B., Zdobnov,  
792 E. M., Pfrender, M. E., Hackett, K. J., Werren, J. H., Worley, K. C., Gibbs, R. A., Chipman, A. D.,  
793 Waterhouse, R. M., Bornberg-Bauer, E., Hahn, M. W., and Richards, S. 2020. Gene content  
794 evolution in the arthropods. *Genome Biology*, 21(1): 1–14.
- 795 Vitting-Seerup, K. and Sandelin, A. 2019. IsoformSwitchAnalyzeR: analysis of changes in genome-  
796 wide patterns of alternative splicing and its functional consequences. *Bioinformatics (Oxford,*  
797 *England)*, 35(21): 4469–4471.
- 798 Wang, X., Wheeler, D., Avery, A., Rago, A., Choi, J. H., Colbourne, J. K., Clark, A. G., and Werren,  
799 J. H. 2013. Function and Evolution of DNA Methylation in *Nasonia vitripennis*. *PLoS Genetics*,  
800 9(10).
- 801 Wang, X., Werren, J. H., and Clark, A. G. 2015. Genetic and epigenetic architecture of sex-biased  
802 expression in the jewel wasps *Nasonia vitripennis* and *giraulti*. *Proceedings of the National*  
803 *Academy of Sciences*, 112(27): E3545–E3554.
- 804 Wexler, J., Delaney, E. K., Belles, X., Schal, C., Wada-Katsumata, A., Amicucci, M. J., and Kopp, A.  
805 2019. Hemimetabolous insects elucidate the origin of sexual development via alternative splicing.  
806 *eLife*, 8: 1–32.
- 807 Yang, P., Chen, X. M., Liu, W. W., Feng, Y., and Sun, T. 2015. Transcriptome Analysis of Sexually  
808 Dimorphic Chinese White Wax Scale Insects Reveals Key Differences in Developmental Programs  
809 and Transcription Factor Expression. *Scientific Reports*, 5: 1–8.
- 810 Zemach, A., McDaniel, I. E., Silva, P., and Zilberman, D. 2010. Genome-wide evolutionary analysis  
811 of eukaryotic DNA methylation. *Science*, 328(5980): 916–919.

## 812 **Data Accessibility**

813 Data have been deposited in GenBank under NCBI BioProject: PRJNA610765. All code is available  
814 at: [http://github.com/RossLab/Sex-Specific\\_Methylation\\_P.citri](http://github.com/RossLab/Sex-Specific_Methylation_P.citri).

## 815 **Author Contributions**

816 L.R. conceived the study. S.A.B. cultured the insects and conducted all lab work. S.A.B. carried  
817 out the differential expression analysis. H.M. carried out all other analyses with contribution from  
818 S.A.B. All authors wrote and reviewed the manuscript.
